# Supplementary material for: Talking to Cows: Reactions to Different Auditory Stimuli During Gentle Human-Animal Interactions
Source: PubMed Central journal article supplement (PMC7593841; doi:10.3389/fpsyg.2020.579346), 2020-10-15
Supplement: Data_Sheet_1.pdf [file Data_Sheet_1.pdf]

# Supplementary Material

## 1 Supplementary Data

**Supplementary Data S1.** Auditory stimulus for the ‘playback’ condition containing a sample of Experimenter A talking in a gentle voice in the same way as in the ‘live’ condition, using phrases with positive content (in German) that were spoken calmly, with long low-pitched vowels and a decrease in pitch towards the end of the words or phrases.

## 2 Supplementary Figures and Tables

### 2.1 Supplementary Figures

**Supplementary Figure S1.** Example photographs of ear positions (Lange et al., 2020). The ear postures are described relative to the vertical axis, an imaginary line through the poll and the caudo-ventral edge of the mandible angle, and the horizontal axis, an imaginary line between the bases of the ears. “Back” means the ear is pointing towards the back of the head, “forward” refers to the rostral end of the head, “up” describes the ear pointing dorsally and “down” pointing ventrally. The example photograph for “forward down” was taken in another experiment because the position did not occur in our study.

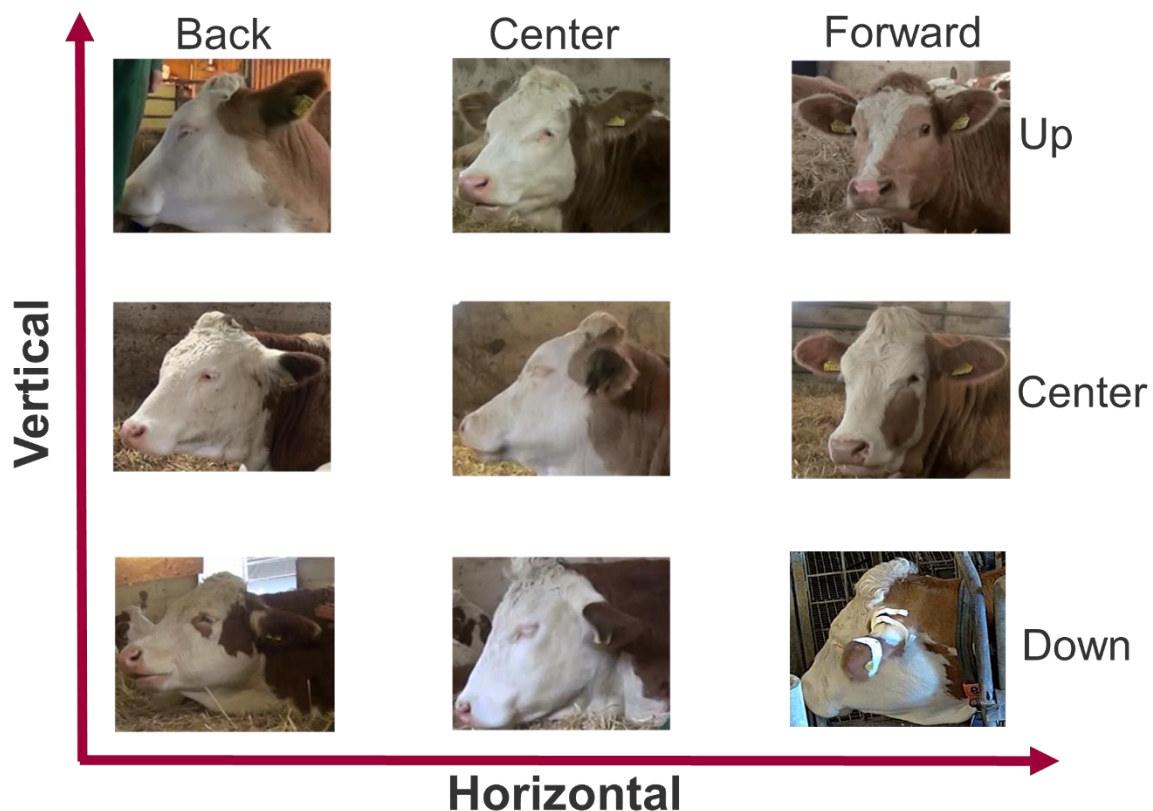

**Supplementary Figure S2.** Example photographs (Lange et al., 2020) of ear positions with lines indicating (a) the vertical axis (yellow, through the poll and the caudo-ventral edge of the mandible angle) and (b) the horizontal axis (red, between the bases of the ears).

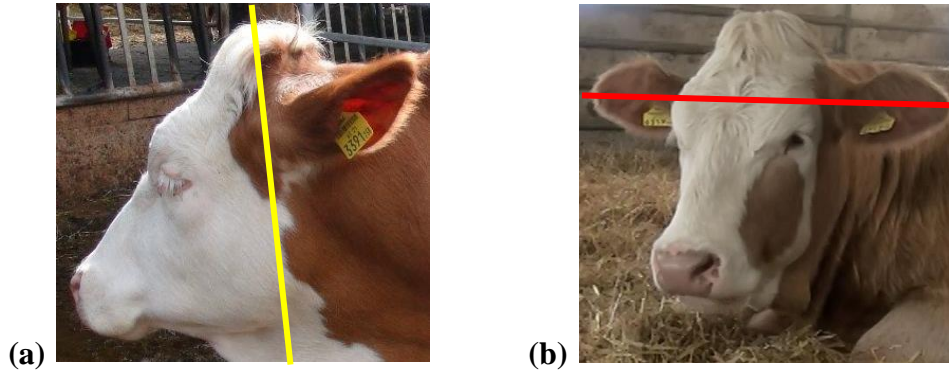

## 2.2 Supplementary Tables

**Supplementary Table S1.** Full and reduced models for the different behaviors of the heifers (n = 28): comparison between the different auditory stimuli over the three phases. Statistically significant results appear in bold. CL: confidence limits. Statistics: GLMMs.

| <b>Full model neck stretching<sup>(1)</sup></b>                                                      |                                                                   |              |       |                     |                     |              |    |                   |
|------------------------------------------------------------------------------------------------------|-------------------------------------------------------------------|--------------|-------|---------------------|---------------------|--------------|----|-------------------|
| Part                                                                                                 | Effects                                                           | Coefficients | SE    | CL <sub>lower</sub> | CL <sub>upper</sub> | z            | df | p                 |
| Mean                                                                                                 | (Intercept)                                                       | -4.285       | 0.219 | -4.658              | -4.008              |              |    | - <sup>(2)</sup>  |
|                                                                                                      | Treatment (playback) <sup>(3)</sup>                               | -0.491       | 0.256 | -0.864              | -0.078              | -1.923       |    | 0.055             |
|                                                                                                      | Phase (STIM) <sup>(4)</sup>                                       | 0.698        | 0.305 | 0.296               | 1.157               | 2.287        |    | 0.022             |
|                                                                                                      | Phase (POST) <sup>(4)</sup>                                       | -0.019       | 0.192 | -0.321              | 0.280               | -0.097       |    | 0.923             |
|                                                                                                      | Test                                                              | -0.046       | 0.068 | -0.146              | 0.051               | -0.672       |    | 0.502             |
|                                                                                                      | Treatment (playback) <sup>(3)</sup> * Phase (STIM) <sup>(4)</sup> | 0.020        | 0.264 | -0.382              | 0.419               | 0.074        |    | 0.941             |
|                                                                                                      | Treatment (playback) <sup>(3)</sup> * Phase (POST) <sup>(4)</sup> | 0.011        | 0.271 | -0.412              | 0.404               | 0.040        |    | 0.968             |
| Precision                                                                                            | (Intercept)                                                       | 2.924        | 0.130 | 2.734               | 3.231               |              |    | -                 |
|                                                                                                      | <b>Treatment (playback)<sup>(3)</sup></b>                         | 0.674        | 0.172 | 0.327               | 1.022               | 3.912        |    | <b>&lt; 0.001</b> |
| <b>Reduced model neck stretching without insignificant treatment*phase interaction<sup>(1)</sup></b> |                                                                   |              |       |                     |                     |              |    |                   |
| Part                                                                                                 | Effects                                                           | Coefficients | SE    | CL <sub>lower</sub> | CL <sub>upper</sub> | z            | df | p                 |
| Mean                                                                                                 | (Intercept)                                                       | -4.291       | 0.199 | -4.577              | -4.022              |              |    | -                 |
|                                                                                                      | Treatment (playback) <sup>(3)</sup>                               | -0.478       | 0.173 | -0.771              | -0.236              | -2.768       |    | 0.006             |
|                                                                                                      | <b>Phase (STIM)<sup>(4)</sup></b>                                 | 0.708        | 0.273 | 0.317               | 1.129               | <b>2.594</b> |    | <b>0.009</b>      |
|                                                                                                      | Phase (POST) <sup>(4)</sup>                                       | -0.013       | 0.135 | -0.223              | 0.193               | -0.097       |    | 0.923             |
|                                                                                                      | Test                                                              | -0.046       | 0.068 | -0.147              | 0.057               | -0.673       |    | 0.501             |
| Precision                                                                                            | (Intercept)                                                       | 2.926        | 0.128 | 2.699               | 3.216               |              |    | -                 |
|                                                                                                      | <b>Treatment (playback)<sup>(3)</sup></b>                         | 0.670        | 0.165 | 0.348               | 1.001               | 16.177       |    | <b>&lt; 0.001</b> |
| <b>Full model contact<sup>(1)</sup></b>                                                              |                                                                   |              |       |                     |                     |              |    |                   |
| Part                                                                                                 | Effects                                                           | Coefficients | SE    | CL <sub>lower</sub> | CL <sub>upper</sub> | z            | df | p                 |
| Mean                                                                                                 | (Intercept)                                                       | -3.412       | 0.248 | -3.729              | -3.166              |              |    | -                 |
|                                                                                                      | Treatment (playback) <sup>(3)</sup>                               | -0.647       | 0.346 | -1.043              | -0.273              | -1.868       |    | 0.062             |
|                                                                                                      | Phase (STIM) <sup>(4)</sup>                                       | 0.156        | 0.254 | -0.121              | 0.45                | 0.615        |    | 0.539             |
|                                                                                                      | Phase (POST) <sup>(4)</sup>                                       | 0.064        | 0.254 | -0.233              | 0.337               | 0.251        |    | 0.802             |
|                                                                                                      | Test                                                              | -0.038       | 0.074 | -0.121              | 0.041               | -0.518       |    | 0.605             |
|                                                                                                      | Treatment (playback) <sup>(3)</sup> * Phase (STIM) <sup>(4)</sup> | -0.039       | 0.357 | -0.465              | 0.359               | -0.110       |    | 0.912             |
| Precision                                                                                            | Treatment (playback) <sup>(3)</sup> * Phase (POST) <sup>(4)</sup> | 0.064        | 0.357 | -0.328              | 0.475               | 0.179        |    | 0.858             |
|                                                                                                      | (Intercept)                                                       | 2.004        | 0.127 | 1.827               | 2.318               |              |    | -                 |
|                                                                                                      | <b>Treatment (playback)<sup>(3)</sup></b>                         | 0.778        | 0.180 | 0.438               | 1.117               | <b>4.321</b> |    | <b>&lt; 0.001</b> |
| <b>Full model resting head<sup>(1)</sup></b>                                                         |                                                                   |              |       |                     |                     |              |    |                   |
| Part                                                                                                 | Effects                                                           | Coefficients | SE    | CL <sub>lower</sub> | CL <sub>upper</sub> | z            | df | p                 |
| Mean                                                                                                 | (Intercept)                                                       | -2.669       | 0.195 | -3.018              | -2.402              |              |    | -                 |

|                                                                                    |                                                                   |                     |              |                           |                           |                      |           |                   |
|------------------------------------------------------------------------------------|-------------------------------------------------------------------|---------------------|--------------|---------------------------|---------------------------|----------------------|-----------|-------------------|
|                                                                                    | Treatment (playback) <sup>(3)</sup>                               | -1.122              | 0.269        | -1.541                    | -0.682                    | -4.165               |           | 0.000             |
|                                                                                    | Phase (STIM) <sup>(4)</sup>                                       | 0.115               | 0.202        | -0.187                    | 0.424                     | 0.569                |           | 0.569             |
|                                                                                    | Phase (POST) <sup>(4)</sup>                                       | 0.105               | 0.202        | -0.192                    | 0.438                     | 0.520                |           | 0.603             |
|                                                                                    | Test                                                              | -0.042              | 0.059        | -0.125                    | 0.043                     | -0.718               |           | 0.473             |
|                                                                                    | Treatment (playback) <sup>(3)</sup> * Phase (STIM) <sup>(4)</sup> | 0.050               | 0.278        | -0.379                    | 0.460                     | 0.181                |           | 0.857             |
|                                                                                    | Treatment (playback) <sup>(3)</sup> * Phase (POST) <sup>(4)</sup> | 0.013               | 0.278        | -0.416                    | 0.422                     | 0.048                |           | 0.961             |
| Precision                                                                          | (Intercept)                                                       | 1.046               | 0.124        | 0.857                     | 1.374                     | 8.433                |           | -                 |
|                                                                                    | <b>Treatment (playback)<sup>(3)</sup></b>                         | 1.413               | 0.178        | 1.056                     | 1.803                     | 7.948                |           | <b>&lt; 0.001</b> |
| <b>Full model flicking</b>                                                         |                                                                   |                     |              |                           |                           |                      |           |                   |
| <b>Part</b>                                                                        | <b>Effects</b>                                                    | <b>Coefficients</b> | <b>SE</b>    | <b>CL<sub>lower</sub></b> | <b>CL<sub>upper</sub></b> | <b>χ<sup>2</sup></b> | <b>df</b> | <b>p</b>          |
| Mean                                                                               | (Intercept)                                                       | -3.792              | 0.139        | -4.059                    | -3.539                    |                      |           | -                 |
|                                                                                    | Treatment (playback) <sup>(3)</sup>                               | 0.296               | 0.186        | -0.068                    | 0.650                     |                      |           | -                 |
|                                                                                    | Phase (STIM) <sup>(4)</sup>                                       | -0.677              | 0.155        | -1.005                    | -0.385                    |                      |           | -                 |
|                                                                                    | Phase (POST) <sup>(4)</sup>                                       | -0.259              | 0.104        | -0.469                    | -0.051                    |                      |           | -                 |
|                                                                                    | Test                                                              | 0.015               | 0.081        | -0.142                    | 0.166                     | 0.036                | 1         | 0.849             |
|                                                                                    | Treatment:Phase <sup>(5)</sup>                                    |                     |              |                           |                           | 0.661                | 2         | 0.718             |
|                                                                                    | Treatment (playback) <sup>(3)</sup> * Phase (STIM) <sup>(4)</sup> | -0.125              | 0.168        | -0.454                    | 0.235                     |                      |           | -                 |
|                                                                                    | Treatment (playback) <sup>(3)</sup> * Phase (POST) <sup>(4)</sup> | -0.090              | 0.149        | -0.383                    | 0.204                     |                      |           | -                 |
| Precision                                                                          | (Intercept)                                                       | 3.978               | 0.135        | 3.754                     | 4.232                     |                      |           | -                 |
|                                                                                    | Treatment (playback) <sup>(3)</sup>                               | -0.177              | 0.176        | -0.506                    | 0.119                     | 1.010                | 1         | 0.315             |
| <b>Reduced model flicking without insignificant treatment*phase interaction</b>    |                                                                   |                     |              |                           |                           |                      |           |                   |
| <b>Part</b>                                                                        | <b>Effects</b>                                                    | <b>Coefficients</b> | <b>SE</b>    | <b>CL<sub>lower</sub></b> | <b>CL<sub>upper</sub></b> | <b>χ<sup>2</sup></b> | <b>df</b> | <b>p</b>          |
| Mean                                                                               | (Intercept)                                                       | -3.720              | 0.130        | -3.960                    | -3.464                    |                      |           | -                 |
|                                                                                    | Treatment (playback) <sup>(3)</sup>                               | 0.166               | 0.160        | -0.153                    | 0.472                     | 1.073                | 1         | 0.300             |
|                                                                                    | <b>Phase (STIM)<sup>(4)</sup></b>                                 | <b>-0.743</b>       | <b>0.132</b> | <b>-1.008</b>             | <b>-0.501</b>             | <b>32.520</b>        | <b>2</b>  | <b>&lt; 0.001</b> |
|                                                                                    | Phase (POST) <sup>(4)</sup>                                       | -0.306              | 0.075        | -0.442                    | -0.143                    |                      |           | -                 |
|                                                                                    | Test                                                              | 0.018               | 0.080        | -0.145                    | 0.185                     | 0.050                | 1         | 0.823             |
| Precision <sup>(6)</sup>                                                           |                                                                   |                     |              |                           |                           |                      |           |                   |
| <b>Full model eye closed</b>                                                       |                                                                   |                     |              |                           |                           |                      |           |                   |
| <b>Part</b>                                                                        | <b>Effects</b>                                                    | <b>Coefficients</b> | <b>SE</b>    | <b>CL<sub>lower</sub></b> | <b>CL<sub>upper</sub></b> | <b>χ<sup>2</sup></b> | <b>df</b> | <b>p</b>          |
| Mean                                                                               | (Intercept)                                                       | -2.033              | 0.153        | -2.338                    | -1.758                    |                      |           | -                 |
|                                                                                    | Treatment (playback) <sup>(3)</sup>                               | 0.162               | 0.200        | -0.238                    | 0.554                     |                      |           | -                 |
|                                                                                    | Phase (STIM) <sup>(4)</sup>                                       | 0.039               | 0.162        | -0.299                    | 0.35                      |                      |           | -                 |
|                                                                                    | Phase (POST) <sup>(4)</sup>                                       | 0.304               | 0.165        | -0.011                    | 0.614                     |                      |           | -                 |
|                                                                                    | Test                                                              | -0.012              | 0.056        | -0.120                    | 0.089                     | 0.045                | 1         | 0.832             |
|                                                                                    | Treatment:Phase <sup>(5)</sup>                                    |                     |              |                           |                           | 1.481                | 2         | 0.477             |
|                                                                                    | Treatment (playback) <sup>(3)</sup> * Phase (STIM) <sup>(4)</sup> | -0.225              | 0.231        | -0.673                    | 0.220                     |                      |           | -                 |
|                                                                                    | Treatment (playback) <sup>(3)</sup> * Phase (POST) <sup>(4)</sup> | -0.260              | 0.232        | -0.695                    | 0.205                     |                      |           | -                 |
| Precision                                                                          | (Intercept)                                                       | 0.617               | 0.115        | 0.446                     | 0.874                     |                      |           | -                 |
|                                                                                    | Treatment (playback) <sup>(3)</sup>                               | -0.003              | 0.150        | -0.313                    | 0.285                     | 0.000                | 1         | 0.986             |
| <b>Full model ear changes</b>                                                      |                                                                   |                     |              |                           |                           |                      |           |                   |
| <b>Part</b>                                                                        | <b>Effects</b>                                                    | <b>Coefficients</b> | <b>SE</b>    | <b>CL<sub>lower</sub></b> | <b>CL<sub>upper</sub></b> | <b>χ<sup>2</sup></b> | <b>df</b> | <b>p</b>          |
| Mean                                                                               | (Intercept)                                                       | 2.530               | 0.111        | 2.305                     | 2.737                     |                      |           | -                 |
|                                                                                    | Treatment (playback) <sup>(3)</sup>                               | 0.015               | 0.128        | -0.251                    | 0.268                     |                      |           | -                 |
|                                                                                    | Phase (STIM) <sup>(4)</sup>                                       | -0.882              | 0.146        | -1.171                    | -0.601                    |                      |           | -                 |
|                                                                                    | Phase (POST) <sup>(4)</sup>                                       | -0.168              | 0.095        | -0.366                    | 0.011                     |                      |           | -                 |
|                                                                                    | Test                                                              | -0.113              | 0.053        | -0.208                    | -0.001                    | 3.970                | 1         | 0.046             |
|                                                                                    | Treatment:Phase <sup>(5)</sup>                                    |                     |              |                           |                           | 0.030                | 2         | 0.985             |
|                                                                                    | Treatment (playback) <sup>(3)</sup> * Phase (STIM) <sup>(4)</sup> | 0.023               | 0.143        |                           |                           |                      |           | -                 |
|                                                                                    | Treatment (playback) <sup>(3)</sup> * Phase (POST) <sup>(4)</sup> | 0.018               | 0.133        | -0.248                    | 0.34                      |                      |           | -                 |
| Precision <sup>(7)</sup>                                                           |                                                                   |                     |              | -0.229                    | 0.276                     |                      |           | -                 |
| <b>Reduced model ear changes without insignificant treatment*phase interaction</b> |                                                                   |                     |              |                           |                           |                      |           |                   |
| <b>Part</b>                                                                        | <b>Effects</b>                                                    | <b>Coefficients</b> | <b>SE</b>    | <b>CL<sub>lower</sub></b> | <b>CL<sub>upper</sub></b> | <b>χ<sup>2</sup></b> | <b>df</b> | <b>p</b>          |
| Mean                                                                               | (Intercept)                                                       | 2.524               | 0.105        | 2.303                     | 2.728                     |                      |           | -                 |
|                                                                                    | Treatment (playback) <sup>(3)</sup>                               | 0.028               | 0.104        | -0.182                    | 0.240                     | 0.070                | 1         | 0.791             |
|                                                                                    | <b>Phase (STIM)<sup>(4)</sup></b>                                 | <b>-0.870</b>       | <b>0.128</b> | <b>-1.138</b>             | <b>-0.622</b>             | <b>31.526</b>        | <b>2</b>  | <b>&lt; 0.001</b> |
|                                                                                    | Phase (POST) <sup>(4)</sup>                                       | -0.159              | 0.067        | -0.292                    | -0.035                    |                      |           | -                 |

|                                                                                                 |                                                                   |                     |           |                           |                           |                      |           |                   |   |
|-------------------------------------------------------------------------------------------------|-------------------------------------------------------------------|---------------------|-----------|---------------------------|---------------------------|----------------------|-----------|-------------------|---|
| Precision <sup>(7)</sup>                                                                        | Test                                                              | -0.113              | 0.053     | -0.221                    | -0.014                    | 3.980                | 1         | 0.046             | - |
| <b>Full model back up</b>                                                                       |                                                                   |                     |           |                           |                           |                      |           |                   |   |
| <b>Part</b>                                                                                     | <b>Effects</b>                                                    | <b>Coefficients</b> | <b>SE</b> | <b>CL<sub>lower</sub></b> | <b>CL<sub>upper</sub></b> | <b>χ<sup>2</sup></b> | <b>df</b> | <b>p</b>          |   |
| Mean                                                                                            | (Intercept)                                                       | 0.085               | 0.194     | -0.343                    | 0.400                     |                      |           |                   | - |
|                                                                                                 | Treatment (playback) <sup>(3)</sup>                               | -0.126              | 0.201     | -0.523                    | 0.262                     |                      |           |                   | - |
|                                                                                                 | Phase (STIM) <sup>(4)</sup>                                       | 1.248               | 0.203     | 0.833                     | 1.616                     |                      |           |                   | - |
|                                                                                                 | Phase (POST) <sup>(4)</sup>                                       | 0.196               | 0.155     | -0.110                    | 0.532                     |                      |           |                   | - |
|                                                                                                 | Test                                                              | 0.208               | 0.079     | 0.051                     | 0.353                     | 5.900                | 1         | 0.015             |   |
|                                                                                                 | Treatment:Phase <sup>(5)</sup>                                    |                     |           |                           |                           | 0.666                | 2         | 0.717             |   |
|                                                                                                 | Treatment (playback) <sup>(3)</sup> * Phase (STIM) <sup>(4)</sup> | -0.175              | 0.230     | -0.614                    | 0.291                     |                      |           |                   | - |
| Precision                                                                                       | Treatment (playback) <sup>(3)</sup> * Phase (POST) <sup>(4)</sup> | -0.141              | 0.224     | -0.59                     | 0.327                     |                      |           |                   | - |
|                                                                                                 | (Intercept)                                                       | 0.992               | 0.111     | 0.791                     | 1.199                     |                      |           |                   | - |
|                                                                                                 | Treatment (playback) <sup>(3)</sup>                               | -0.093              | 0.136     | -0.368                    | 0.16                      | 0.469                | 1         | 0.493             |   |
| <b>Reduced model back up without insignificant treatment*phase interaction</b>                  |                                                                   |                     |           |                           |                           |                      |           |                   |   |
| <b>Part</b>                                                                                     | <b>Effects</b>                                                    | <b>Coefficients</b> | <b>SE</b> | <b>CL<sub>lower</sub></b> | <b>CL<sub>upper</sub></b> | <b>χ<sup>2</sup></b> | <b>df</b> | <b>p</b>          |   |
| Mean                                                                                            | (Intercept)                                                       | 0.135               | 0.183     | -0.270                    | 0.436                     |                      |           |                   | - |
|                                                                                                 | Treatment (playback) <sup>(3)</sup>                               | -0.227              | 0.156     | -0.517                    | 0.057                     | 2.122                | 1         | 0.145             |   |
|                                                                                                 | <b>Phase (STIM)<sup>(4)</sup></b>                                 | 1.160               | 0.167     | 0.826                     | 1.445                     | <b>30.705</b>        | <b>2</b>  | <b>&lt; 0.001</b> |   |
|                                                                                                 | Phase (POST) <sup>(4)</sup>                                       | 0.128               | 0.112     | -0.082                    | 0.351                     |                      |           |                   | - |
|                                                                                                 | Test                                                              | 0.207               | 0.079     | 0.056                     | 0.359                     | 5.845                | 1         | 0.016             |   |
| Precision                                                                                       | (Intercept)                                                       | 0.980               | 0.109     | 0.778                     | 1.168                     |                      |           |                   | - |
|                                                                                                 | Treatment (playback) <sup>(3)</sup>                               | -0.073              | 0.132     | -0.339                    | 0.174                     | 0.308                | 1         | 0.579             |   |
| <b>Full model back centre</b>                                                                   |                                                                   |                     |           |                           |                           |                      |           |                   |   |
| <b>Part</b>                                                                                     | <b>Effects</b>                                                    | <b>Coefficients</b> | <b>SE</b> | <b>CL<sub>lower</sub></b> | <b>CL<sub>upper</sub></b> | <b>χ<sup>2</sup></b> | <b>df</b> | <b>p</b>          |   |
| Mean                                                                                            | (Intercept)                                                       | -2.049              | 0.152     | -2.368                    | -1.777                    |                      |           |                   | - |
|                                                                                                 | Treatment (playback) <sup>(3)</sup>                               | 0.428               | 0.190     | 0.042                     | 0.796                     |                      |           |                   | - |
|                                                                                                 | Phase (STIM) <sup>(4)</sup>                                       | -0.211              | 0.155     | -0.518                    | 0.098                     |                      |           |                   | - |
|                                                                                                 | Phase (POST) <sup>(4)</sup>                                       | 0.244               | 0.154     | -0.051                    | 0.571                     |                      |           |                   | - |
|                                                                                                 | Test                                                              | -0.100              | 0.052     | -0.196                    | 0.002                     | 3.776                | 1         | 0.052             |   |
|                                                                                                 | Treatment:Phase <sup>(5)</sup>                                    |                     |           |                           |                           | 0.113                | 2         | 0.945             |   |
|                                                                                                 | Treatment (playback) <sup>(3)</sup> * Phase (STIM) <sup>(4)</sup> | -0.008              | 0.226     | -0.458                    | 0.449                     |                      |           |                   | - |
| Precision                                                                                       | Treatment (playback) <sup>(3)</sup> * Phase (POST) <sup>(4)</sup> | -0.069              | 0.225     | -0.507                    | 0.377                     |                      |           |                   | - |
|                                                                                                 | (Intercept)                                                       | 1.239               | 0.120     | 1.054                     | 1.489                     |                      |           |                   | - |
|                                                                                                 | <b>Treatment (playback)<sup>(3)</sup></b>                         | -0.461              | 0.142     | -0.740                    | -0.204                    | <b>10.357</b>        | <b>1</b>  | <b>0.001</b>      |   |
| <b>Reduced model back centre without insignificant treatment*phase interaction</b>              |                                                                   |                     |           |                           |                           |                      |           |                   |   |
| <b>Part</b>                                                                                     | <b>Effects</b>                                                    | <b>Coefficients</b> | <b>SE</b> | <b>CL<sub>lower</sub></b> | <b>CL<sub>upper</sub></b> | <b>χ<sup>2</sup></b> | <b>df</b> | <b>p</b>          |   |
| Mean                                                                                            | (Intercept)                                                       | -2.035              | 0.138     | -2.322                    | -1.788                    |                      |           |                   | - |
|                                                                                                 | Treatment (playback) <sup>(3)</sup>                               | 0.400               | 0.137     | 0.128                     | 0.664                     | 8.029                | 1         | 0.052             |   |
|                                                                                                 | <b>Phase (STIM)<sup>(4)</sup></b>                                 | -0.214              | 0.113     | -0.460                    | -0.008                    | <b>13.500</b>        | <b>2</b>  | <b>0.001</b>      |   |
|                                                                                                 | Phase (POST) <sup>(4)</sup>                                       | 0.212               | 0.113     | -0.013                    | 0.453                     |                      |           |                   | - |
|                                                                                                 | Test                                                              | -0.099              | 0.052     | -0.203                    | 0.001                     | 3.771                | 1         | 0.052             |   |
| Precision                                                                                       | (Intercept)                                                       | 1.235               | 0.119     | 1.051                     | 1.474                     |                      |           |                   | - |
|                                                                                                 | <b>Treatment (playback)<sup>(3)</sup></b>                         | -0.457              | 0.141     | -0.717                    | -0.181                    | <b>10.273</b>        | <b>1</b>  | <b>0.001</b>      |   |
| <b>Full model forward up<sup>(1)</sup></b>                                                      |                                                                   |                     |           |                           |                           |                      |           |                   |   |
| <b>Part</b>                                                                                     | <b>Effects</b>                                                    | <b>Coefficients</b> | <b>SE</b> | <b>CL<sub>lower</sub></b> | <b>CL<sub>upper</sub></b> | <b>z</b>             | <b>df</b> | <b>p</b>          |   |
| Mean                                                                                            | (Intercept)                                                       | -2.814              | 0.235     | -3.098                    | -2.549                    |                      |           |                   | - |
|                                                                                                 | Treatment (playback) <sup>(3)</sup>                               | -0.009              | 0.337     | -0.392                    | 0.363                     | -0.027               |           | 0.978             |   |
|                                                                                                 | Phase (STIM) <sup>(4)</sup>                                       | -0.293              | 0.257     | -0.588                    | 0.001                     | -1.139               |           | 0.255             |   |
|                                                                                                 | Phase (POST) <sup>(4)</sup>                                       | -0.011              | 0.256     | -0.318                    | 0.280                     | -0.041               |           | 0.967             |   |
|                                                                                                 | Test                                                              | -0.038              | 0.074     | -0.129                    | 0.051                     | -0.517               |           | 0.605             |   |
|                                                                                                 | Treatment (playback) <sup>(3)</sup> * Phase (STIM) <sup>(4)</sup> | -0.014              | 0.366     | -0.448                    | 0.415                     | -0.038               |           | 0.970             |   |
|                                                                                                 | Treatment (playback) <sup>(3)</sup> * Phase (POST) <sup>(4)</sup> | -0.088              | 0.365     | -0.473                    | 0.339                     | -0.241               |           | 0.810             |   |
| Precision                                                                                       | (Intercept)                                                       | 1.661               | 0.120     | 1.475                     | 1.971                     |                      |           |                   | - |
|                                                                                                 | Treatment (playback) <sup>(3)</sup>                               | -0.015              | 0.173     | -0.350                    | 0.328                     | -0.087               |           | 0.930             |   |
| <b>Reduced model forward up without insignificant treatment*phase interaction<sup>(1)</sup></b> |                                                                   |                     |           |                           |                           |                      |           |                   |   |
| <b>Part</b>                                                                                     | <b>Effects</b>                                                    | <b>Coefficients</b> | <b>SE</b> | <b>CL<sub>lower</sub></b> | <b>CL<sub>upper</sub></b> | <b>z</b>             | <b>df</b> | <b>p</b>          |   |
| Mean                                                                                            | (Intercept)                                                       | -2.797              | 0.157     | -3.058                    | -2.578                    |                      |           |                   | - |
|                                                                                                 | Treatment (playback) <sup>(3)</sup>                               | -0.044              | 0.199     | -0.368                    | 0.270                     | -0.219               |           | 0.827             |   |

|                                                                                |                                                                   |                     |              |                           |                           |                      |           |              |
|--------------------------------------------------------------------------------|-------------------------------------------------------------------|---------------------|--------------|---------------------------|---------------------------|----------------------|-----------|--------------|
|                                                                                | <b>Phase (STIM)<sup>(4)</sup></b>                                 | -0.300              | 0.135        | -0.503                    | -0.072                    | <b>-2.216</b>        |           | <b>0.027</b> |
|                                                                                | Phase (POST) <sup>(4)</sup>                                       | -0.054              | 0.135        | -0.269                    | 0.164                     | -0.401               |           | 0.689        |
|                                                                                | Test                                                              | -0.038              | 0.055        | -0.123                    | 0.049                     | -0.700               |           | 0.484        |
| Precision                                                                      | (Intercept)                                                       | 1.660               | 0.120        | 1.474                     | 1.932                     |                      |           | -            |
|                                                                                | Treatment (playback) <sup>(3)</sup>                               | -0.014              | 0.172        | -0.334                    | 0.339                     | -0.083               |           | 0.934        |
| <b>Full model ear low</b>                                                      |                                                                   |                     |              |                           |                           |                      |           |              |
| <b>Part</b>                                                                    | <b>Effects</b>                                                    | <b>Coefficients</b> | <b>SE</b>    | <b>CL<sub>lower</sub></b> | <b>CL<sub>upper</sub></b> | <b>χ<sup>2</sup></b> | <b>df</b> | <b>p</b>     |
| Mean                                                                           | (Intercept)                                                       | -0.463              | 0.444        | -1.307                    | 0.312                     |                      |           | -            |
|                                                                                | Treatment (playback) <sup>(3)</sup>                               | 0.023               | 0.461        | -0.913                    | 0.892                     |                      |           | -            |
|                                                                                | Phase (STIM) <sup>(4)</sup>                                       | -1.138              | 0.434        | -2.009                    | -0.350                    |                      |           | -            |
|                                                                                | Phase (POST) <sup>(4)</sup>                                       | 0.409               | 0.407        | -0.341                    | 1.144                     |                      |           | -            |
|                                                                                | Test                                                              | -0.433              | 0.178        | -0.801                    | -0.087                    | 5.356                | 1         | 0.052        |
|                                                                                | Treatment:Phase <sup>(5)</sup>                                    |                     |              |                           |                           | 0.664                | 2         | 0.717        |
|                                                                                | Treatment (playback) <sup>(3)</sup> * Phase (STIM) <sup>(4)</sup> | 0.307               | 0.592        | -0.805                    | 1.496                     |                      |           | -            |
|                                                                                | Treatment (playback) <sup>(3)</sup> * Phase (POST) <sup>(4)</sup> | -0.172              | 0.568        | -1.247                    | 0.917                     |                      |           | -            |
| Precision <sup>(7)</sup>                                                       |                                                                   |                     |              |                           |                           |                      |           | -            |
| <b>Reduced model ear low without insignificant treatment*phase interaction</b> |                                                                   |                     |              |                           |                           |                      |           |              |
| <b>Part</b>                                                                    | <b>Effects</b>                                                    | <b>Coefficients</b> | <b>SE</b>    | <b>CL<sub>lower</sub></b> | <b>CL<sub>upper</sub></b> | <b>χ<sup>2</sup></b> | <b>df</b> | <b>p</b>     |
| Mean                                                                           | (Intercept)                                                       | -0.477              | 0.411        | -1.339                    | 0.306                     |                      |           | -            |
|                                                                                | Treatment (playback) <sup>(3)</sup>                               | 0.055               | 0.325        | -0.568                    | 0.666                     | 0.028                | 1         | 0.052        |
|                                                                                | <b>Phase (STIM)<sup>(4)</sup></b>                                 | <b>-0.977</b>       | <b>0.303</b> | <b>-1.569</b>             | <b>-0.374</b>             | <b>19.094</b>        | <b>2</b>  | <b>0.000</b> |
|                                                                                | Phase (POST) <sup>(4)</sup>                                       | 0.321               | 0.284        | -0.213                    | 0.861                     |                      |           | -            |
|                                                                                | Test                                                              | -0.429              | 0.177        | -0.782                    | -0.123                    | 5.286                | 1         | 0.021        |
| Precision <sup>(7)</sup>                                                       |                                                                   |                     |              |                           |                           |                      |           | -            |

<sup>(1)</sup> overdispersion; SE, z- and p-values corrected for overdispersion (p-value based on Wald's z-approximation; recognizable by no df indicated)

<sup>(2)</sup> not shown because of having a very limited interpretation

<sup>(3)</sup> dummy coded ('live' as reference category)

<sup>(4)</sup> dummy coded (PRE as reference category)

<sup>(5)</sup> the indicated test refers to the overall effect of the interaction between treatment and phase

<sup>(6)</sup> no precision part available due to convergence problems

<sup>(7)</sup> no precision part because the model is not based on beta error structure

**Supplementary Table S2.** Full models for HR(V) parameters of the heifers (n = 26): comparison between the different auditory stimuli over the three phases. Statistically significant results appear in bold. CL: confidence limits. Statistics: LMMs.

|                                                                   |                     |           |                           |                           |                      |           |              |                |
|-------------------------------------------------------------------|---------------------|-----------|---------------------------|---------------------------|----------------------|-----------|--------------|----------------|
| <b>Full model HR</b>                                              |                     |           |                           |                           |                      |           |              |                |
| <b>Effects</b>                                                    | <b>Coefficients</b> | <b>SE</b> | <b>CL<sub>lower</sub></b> | <b>CL<sub>upper</sub></b> | <b>χ<sup>2</sup></b> | <b>df</b> | <b>p</b>     |                |
| (Intercept)                                                       | 74.081              | 2.169     | 69.884                    | 78.262                    |                      |           |              | <sub>(1)</sub> |
| Treatment (playback) <sup>(2)</sup>                               | -2.364              | 2.111     | -6.543                    | 2.116                     |                      |           |              | -              |
| Phase (STIM) <sup>(3)</sup>                                       | 1.541               | 0.401     | 0.815                     | 2.305                     |                      |           |              | -              |
| Phase (POST) <sup>(3)</sup>                                       | -0.555              | 0.352     | -1.234                    | 0.136                     |                      |           |              | -              |
| Rumination                                                        | 1.694               | 0.215     | 1.262                     | 2.106                     | 43.959               | 1         | 0.000        |                |
| sin(rad.time)1                                                    | -2.239              | 1.046     | -4.508                    | 0.300                     | 2.799                | 1         | 0.094        |                |
| cos(rad.time)1                                                    | -8.550              | 1.102     | -11.054                   | -5.957                    | 11.193               | 1         | 0.001        |                |
| Age                                                               | -4.112              | 1.982     | -8.466                    | -0.087                    | 12.200               | 1         | 0.000        |                |
| Group                                                             | -10.326             | 3.360     | -17.398                   | -2.942                    | 5.786                | 1         | 0.016        |                |
| <b>Treatment:Phase<sup>(4)</sup></b>                              |                     |           |                           |                           | <b>9.917</b>         | <b>2</b>  | <b>0.007</b> |                |
| Treatment (playback) <sup>(2)</sup> * Phase (STIM) <sup>(3)</sup> | -0.245              | 0.448     | -1.181                    | 0.600                     |                      |           |              | -              |
| Treatment (playback) <sup>(2)</sup> * Phase (POST) <sup>(3)</sup> | 1.111               | 0.449     | 0.194                     | 1.959                     |                      |           |              | -              |
| <b>Full model RMSSD</b>                                           |                     |           |                           |                           |                      |           |              |                |
| <b>Effects</b>                                                    | <b>Coefficients</b> | <b>SE</b> | <b>CL<sub>lower</sub></b> | <b>CL<sub>upper</sub></b> | <b>χ<sup>2</sup></b> | <b>df</b> | <b>p</b>     |                |
| (Intercept)                                                       | 2.808               | 0.145     | 2.512                     | 3.130                     |                      |           |              | <sub>(1)</sub> |
| Treatment (playback) <sup>(2)</sup>                               | -0.067              | 0.077     | -0.229                    | 0.083                     |                      |           |              | -              |
| Phase (STIM) <sup>(3)</sup>                                       | -0.021              | 0.054     | -0.131                    | 0.095                     |                      |           |              | -              |
| Phase (POST) <sup>(3)</sup>                                       | 0.020               | 0.056     | -0.097                    | 0.132                     |                      |           |              | -              |
| Heart rate                                                        | -0.349              | 0.055     | -0.471                    | -0.229                    | 22.351               | 1         | 0.000        |                |
| Rumination                                                        | 0.047               | 0.028     | -0.012                    | 0.108                     | 1.813                | 1         | 0.178        |                |
| sin(rad.time)1                                                    | -0.032              | 0.076     | -0.210                    | 0.155                     | 0.112                | 1         | 0.738        |                |
| cos(rad.time)1                                                    | -0.062              | 0.099     | -0.293                    | 0.161                     | 0.64                 | 1         | 0.424        |                |
| Age                                                               | -0.095              | 0.129     | -0.383                    | 0.182                     | 0.414                | 1         | 0.520        |                |

|                                                                   |                     |           |                           |                           |                            |           |              |
|-------------------------------------------------------------------|---------------------|-----------|---------------------------|---------------------------|----------------------------|-----------|--------------|
| Group                                                             | -0.258              | 0.278     | -0.879                    | 0.355                     | 1.174                      | 1         | 0.279        |
| Treatment:Phase <sup>(4)</sup>                                    |                     |           |                           |                           | 0.673                      | 2         | 0.714        |
| Treatment (playback) <sup>(2)</sup> * Phase (STIM) <sup>(3)</sup> | 0.013               | 0.072     | -0.122                    | 0.148                     |                            |           | -            |
| Treatment (playback) <sup>(2)</sup> * Phase (POST) <sup>(3)</sup> | 0.057               | 0.073     | -0.082                    | 0.209                     |                            |           | -            |
| <b>Full model SDNN</b>                                            |                     |           |                           |                           |                            |           |              |
| <b>Effects</b>                                                    | <b>Coefficients</b> | <b>SE</b> | <b>CL<sub>lower</sub></b> | <b>CL<sub>upper</sub></b> | <b><math>\chi^2</math></b> | <b>df</b> | <b>p</b>     |
| (Intercept)                                                       | 5.208               | 0.291     | 3.030                     | 3.452                     |                            |           | _(1)         |
| Treatment (playback) <sup>(2)</sup>                               | -0.046              | 0.245     | -0.212                    | 0.135                     |                            |           | -            |
| Phase (STIM) <sup>(3)</sup>                                       | 0.447               | 0.208     | 0.039                     | 0.335                     |                            |           | -            |
| Phase (POST) <sup>(3)</sup>                                       | 0.088               | 0.207     | -0.100                    | 0.186                     |                            |           | -            |
| Heart rate                                                        | -0.562              | 0.134     | -0.345                    | -0.117                    | 11.671                     | 1         | 0.001        |
| Rumination                                                        | -0.098              | 0.087     | -0.091                    | 0.034                     | 1.486                      | 1         | 0.223        |
| sin(rad.time)1                                                    | -0.142              | 0.220     | -0.225                    | 0.097                     | 2.608                      | 1         | 0.456        |
| cos(rad.time)1                                                    | -0.501              | 0.270     | -0.426                    | -0.041                    | 4.173                      | 1         | 0.243        |
| Age                                                               | -0.173              | 0.203     | -0.254                    | 0.064                     | 0.328                      | 1         | 0.567        |
| Group                                                             | -0.389              | 0.442     | -0.511                    | 0.185                     | 1.15                       | 1         | 0.284        |
| <b>Treatment:Phase<sup>(4)</sup></b>                              |                     |           |                           |                           | <b>9.963</b>               | <b>2</b>  | <b>0.007</b> |
| Treatment (playback) <sup>(2)</sup> * Phase (STIM) <sup>(3)</sup> | -0.466              | 0.283     | -0.346                    | 0.029                     |                            |           | -            |
| Treatment (playback) <sup>(2)</sup> * Phase (POST) <sup>(3)</sup> | 0.411               | 0.284     | -0.053                    | 0.317                     |                            |           | -            |
| <b>Full model RMSSD/SDNN</b>                                      |                     |           |                           |                           |                            |           |              |
| <b>Effects</b>                                                    | <b>Coefficients</b> | <b>SE</b> | <b>CL<sub>lower</sub></b> | <b>CL<sub>upper</sub></b> | <b><math>\chi^2</math></b> | <b>df</b> | <b>p</b>     |
| (Intercept)                                                       | 0.821               | 0.040     | 0.737                     | 0.906                     |                            |           | _(1)         |
| Treatment (playback) <sup>(2)</sup>                               | -0.036              | 0.026     | -0.085                    | 0.018                     |                            |           | -            |
| Phase (STIM) <sup>(3)</sup>                                       | -0.063              | 0.023     | -0.106                    | -0.016                    |                            |           | -            |
| Phase (POST) <sup>(3)</sup>                                       | -0.005              | 0.024     | -0.053                    | 0.039                     |                            |           | -            |
| Heart rate                                                        | -0.093              | 0.016     | -0.126                    | -0.057                    | 27.486                     | 1         | 0.000        |
| Rumination                                                        | 0.023               | 0.009     | 0.003                     | 0.043                     | 4.815                      | 1         | 0.028        |
| sin(rad.time)1                                                    | -0.006              | 0.023     | -0.055                    | 0.040                     | -0.01                      | 1         | 1            |
| cos(rad.time)1                                                    | 0.034               | 0.028     | -0.034                    | 0.093                     | 1.107                      | 1         | 0.293        |
| Age                                                               | -0.048              | 0.030     | -0.118                    | 0.022                     | 1.699                      | 1         | 0.192        |
| Group                                                             | -0.032              | 0.066     | -0.181                    | 0.119                     | 0.173                      | 1         | 0.677        |
| <b>Treatment:Phase<sup>(4)</sup></b>                              |                     |           |                           |                           | <b>8.378</b>               | <b>2</b>  | <b>0.015</b> |
| Treatment (playback) <sup>(2)</sup> * Phase (STIM) <sup>(3)</sup> | 0.063               | 0.030     | 0.002                     | 0.117                     |                            |           | -            |
| Treatment (playback) <sup>(2)</sup> * Phase (POST) <sup>(3)</sup> | -0.022              | 0.03      | -0.083                    | 0.038                     |                            |           | -            |
| <b>Full model HF</b>                                              |                     |           |                           |                           |                            |           |              |
| <b>Effects</b>                                                    | <b>Coefficients</b> | <b>SE</b> | <b>CL<sub>lower</sub></b> | <b>CL<sub>upper</sub></b> | <b><math>\chi^2</math></b> | <b>df</b> | <b>p</b>     |
| (Intercept)                                                       | 2.903               | 0.157     | 2.559                     | 3.219                     |                            |           | _(1)         |
| Treatment (playback) <sup>(2)</sup>                               | -0.007              | 0.119     | -0.241                    | 0.237                     |                            |           | -            |
| Phase (STIM) <sup>(3)</sup>                                       | -0.043              | 0.114     | -0.256                    | 0.187                     |                            |           | -            |
| Phase (POST) <sup>(3)</sup>                                       | 0.222               | 0.107     | 0.000                     | 0.435                     |                            |           | -            |
| Heart rate                                                        | -0.584              | 0.081     | -0.765                    | -0.407                    | 41.484                     | 1         | 0.000        |
| Rumination                                                        | 0.085               | 0.044     | -0.006                    | 0.177                     | 2.994                      | 1         | 0.084        |
| sin(rad.time)1                                                    | 0.020               | 0.098     | -0.198                    | 0.214                     | 0.038                      | 1         | 0.846        |
| cos(rad.time)1                                                    | 0.328               | 0.115     | 0.064                     | 0.581                     | 6.801                      | 1         | 0.009        |
| Age                                                               | -0.220              | 0.135     | -0.513                    | 0.065                     | 2.226                      | 1         | 0.136        |
| Group                                                             | -0.153              | 0.315     | -0.806                    | 0.576                     | 0.206                      | 1         | 0.650        |
| <b>Treatment:Phase<sup>(4)</sup></b>                              |                     |           |                           |                           | <b>7.657</b>               | <b>2</b>  | <b>0.022</b> |
| Treatment (playback) <sup>(2)</sup> * Phase (STIM) <sup>(3)</sup> | 0.070               | 0.143     | -0.220                    | 0.351                     |                            |           | -            |
| Treatment (playback) <sup>(2)</sup> * Phase (POST) <sup>(3)</sup> | -0.307              | 0.143     | -0.586                    | -0.031                    |                            |           | -            |
| <b>Full model LF</b>                                              |                     |           |                           |                           |                            |           |              |
| <b>Effects</b>                                                    | <b>Coefficients</b> | <b>SE</b> | <b>CL<sub>lower</sub></b> | <b>CL<sub>upper</sub></b> | <b><math>\chi^2</math></b> | <b>df</b> | <b>p</b>     |
| (Intercept)                                                       | 67.999              | 3.984     | 60.143                    | 76.398                    |                            |           | _(1)         |
| Treatment (playback) <sup>(2)</sup>                               | 0.081               | 3.222     | -6.357                    | 6.435                     |                            |           | -            |
| Phase (STIM) <sup>(3)</sup>                                       | -0.041              | 3.074     | -5.867                    | 5.811                     |                            |           | -            |
| Phase (POST) <sup>(3)</sup>                                       | -1.584              | 3.172     | -8.046                    | 4.931                     |                            |           | -            |
| Heart rate                                                        | 7.639               | 1.743     | 4.001                     | 11.392                    | 15.572                     | 1         | 0.000        |
| Rumination                                                        | 1.252               | 1.185     | -1.224                    | 3.678                     | 0.990                      | 1         | 0.320        |
| sin(rad.time)1                                                    | 1.013               | 2.858     | -4.777                    | 6.805                     | 0.180                      | 1         | 0.671        |
| cos(rad.time)1                                                    | -4.792              | 3.523     | -12.146                   | 2.750                     | 1.336                      | 1         | 0.248        |
| Age                                                               | 0.895               | 2.997     | -5.524                    | 7.294                     | 0.154                      | 1         | 0.695        |
| Group                                                             | 5.955               | 6.842     | -8.596                    | 20.433                    | 0.613                      | 1         | 0.434        |
| <b>Treatment:Phase<sup>(4)</sup></b>                              |                     |           |                           |                           | <b>0.009</b>               | <b>2</b>  | <b>0.995</b> |
| Treatment (playback) <sup>(2)</sup> * Phase (STIM) <sup>(3)</sup> | -0.372              | 4.189     | -8.479                    | 7.639                     |                            |           | -            |
| Treatment (playback) <sup>(2)</sup> * Phase (POST) <sup>(3)</sup> | -0.072              | 4.210     | -7.890                    | 8.384                     |                            |           | -            |

| <b>Full model LF/HF</b>                                           |                     |           |                           |                           |                            |           |                   |
|-------------------------------------------------------------------|---------------------|-----------|---------------------------|---------------------------|----------------------------|-----------|-------------------|
| <b>Effects</b>                                                    | <b>Coefficients</b> | <b>SE</b> | <b>CL<sub>lower</sub></b> | <b>CL<sub>upper</sub></b> | <b><math>\chi^2</math></b> | <b>df</b> | <b>p</b>          |
| (Intercept)                                                       | 1.204               | 0.209     | 0.747                     | 1.631                     |                            |           | _( <sup>1</sup> ) |
| Treatment (playback) <sup>(2)</sup>                               | -0.025              | 0.164     | -0.340                    | 0.295                     |                            |           | -                 |
| Phase (STIM) <sup>(3)</sup>                                       | 0.005               | 0.160     | -0.297                    | 0.304                     |                            |           | -                 |
| Phase (POST) <sup>(3)</sup>                                       | -0.270              | 0.152     | -0.567                    | 0.052                     |                            |           | -                 |
| Heart rate                                                        | 0.703               | 0.102     | 0.475                     | 0.921                     | 32.913                     | 1         | 0.000             |
| Rumination                                                        | -0.040              | 0.062     | -0.167                    | 0.098                     | 0.373                      | 1         | 0.542             |
| sin(rad.time)1                                                    | -0.028              | 0.146     | -0.327                    | 0.267                     | -1.902                     | 1         | 1                 |
| cos(rad.time)1                                                    | -0.497              | 0.173     | -0.877                    | -0.146                    | 5.543                      | 1         | 0.019             |
| Age                                                               | 0.033               | 0.169     | -0.347                    | 0.376                     | 0.030                      | 1         | 0.863             |
| Group                                                             | 0.580               | 0.404     | -0.306                    | 1.429                     | -1.310                     | 1         | 1                 |
| Treatment:Phase <sup>(4)</sup>                                    |                     |           |                           |                           | 1.994                      | 2         | 0.369             |
| Treatment (playback) <sup>(2)</sup> * Phase (STIM) <sup>(3)</sup> | -0.024              | 0.206     | -0.408                    | 0.399                     |                            |           | -                 |
| Treatment (playback) <sup>(2)</sup> * Phase (POST) <sup>(3)</sup> | 0.337               | 0.206     | -0.068                    | 0.722                     |                            |           | -                 |

<sup>(1)</sup> not shown because of having a very limited interpretation

<sup>(2)</sup> dummy coded ('live' as reference category)

<sup>(3)</sup> dummy coded (PRE as reference category)

<sup>(4)</sup> the indicated test refers to the overall effect of the interaction between treatment and phase
